# Supplementary material
Source: HighWire-hosted journal article supplement (https://informatics.bmj.com/content/30/1/e100894)
Supplement: inline-supplementary-material-1 [file inline-supplementary-material-1.pdf]

**Appendix Table 1.** List of diabetes medication, types, and DIN

| <b>Diabetes Drug Type</b>   | <b>Drug Identification Number (DIN)</b>                                                                                                                                                                                                    |
|-----------------------------|--------------------------------------------------------------------------------------------------------------------------------------------------------------------------------------------------------------------------------------------|
| Short-acting insulin        | Regular insulin (Humulin and Novolin)<br>01962639, 00889113, 01962655,<br>00889105, 00795879, 01959212,<br>01962647, 00889091, 01962663,<br>00889121, 00587737, 01959239,<br>02403447, 02241310, 00586714,<br>02415089, 01959220, 00733075 |
| Rapid-acting insulins       | Insulin aspart<br>02460408, 02460416, 02460424,<br>02520974, 02520982, 02265435,<br>02244353, 02245397, 02377209                                                                                                                           |
|                             | Insulin glulisine<br>02279460, 02279479, 02279487, 02294346                                                                                                                                                                                |
|                             | Insulin lispro (Humalog)<br>02229704, 02470152, 02229705,<br>02403412, 02439611, 02240294,<br>02403420, 02240295, 02240297,<br>02403439, 02241283, 02469898,<br>02469901, 02469871, 02506564,<br>02506572, 02529254                        |
| Intermediate-acting insulin | Insulin isophane (Humulin N, Novolin N)<br>01962639, 00889113, 01962655,<br>00889105, 00795879, 01959212,<br>01962647, 00889091, 01962663,                                                                                                 |

|                             |                                                                                                                                                                                                   |
|-----------------------------|---------------------------------------------------------------------------------------------------------------------------------------------------------------------------------------------------|
|                             | 00889121, 01959239, 02403447,<br>02024306, 02024217, 02025248,<br>02024314, 02024322, 02024225,<br>02024268, 02024446, 02024403,<br>02024322, 02024225, 02024268,<br>02024233, 02024284, 02024314 |
| <b>Long-acting insulins</b> | Insulin degludec<br><br>02467860, 02467879, 02467887,<br>02474875, 02474875                                                                                                                       |
|                             | Insulin detemir<br><br>02412829, 02271842                                                                                                                                                         |
|                             | Insulin glargine<br><br>02444844, 02461528, 02245689,<br>02251930, 02294338, 02526441,<br>02478293, 02478293, 02493373, 02441829                                                                  |
|                             |                                                                                                                                                                                                   |
| <b>Combination insulins</b> | Humalog Mix 75/25 (insulin lispro<br>protamine-insulin lispro)<br><br>02240294, 02403420, 02240295                                                                                                |
|                             | Humalog Mix 50/50 (insulin lispro<br>protamine-insulin lispro)<br><br>02240297, 02403439                                                                                                          |

|            |                                                                                                                                                                                                                                                                                                                                                                                                     |
|------------|-----------------------------------------------------------------------------------------------------------------------------------------------------------------------------------------------------------------------------------------------------------------------------------------------------------------------------------------------------------------------------------------------------|
|            | Humulin 70/30 (human insulin NPH-human insulin regular)<br><br>00795879, 01959212                                                                                                                                                                                                                                                                                                                   |
|            | Novolin 70/30<br><br>02024217, 02025248                                                                                                                                                                                                                                                                                                                                                             |
| Biguanides | Metformin (Glucophage, Metformin Hydrochloride ER, Glumetza, Riomet, Fortamet)<br><br>02099233, 02162849, 02446065, 02162822, 02229517, 02231389, 02238827, 02242793, 02242794, 02246965, 02284782, 02284790, 02343606, 02343614, 02353377, 02353385, 02378841, 02378868, 02385341, 02385368, 02268493, 02300451, 02268507<br><br>Metformin-alogliptin (Kazano)<br><br>02417219, 02417227, 02417235 |
|            | Metformin-canagliflozin (Invokamet)<br><br>02455404, 02455412, 02455420, 02455439, 02455447, 02455455, 02477394, 02477408, 02477416, 02477424                                                                                                                                                                                                                                                       |
|            | Metformin-dapagliflozin (Xigduo XR)<br><br>02449935, 02449943                                                                                                                                                                                                                                                                                                                                       |

|                                           |                                                                                                     |
|-------------------------------------------|-----------------------------------------------------------------------------------------------------|
|                                           | Metformin-empagliflozin (Synjardy)<br>02456575, 02456583, 02456591,<br>02456605, 02456613, 02456621 |
|                                           | Metformin-linagliptin (Jentadueto)<br>02403250, 02403269, 02403277                                  |
|                                           | Metformin-rosiglitazone (Avandamet)<br>02247085, 02247086, 02247087,<br>02248440, 02248441          |
|                                           | Metformin-saxagliptin (Kombiglyze XR)<br>02389169, 02389177, 02389185                               |
|                                           | Metformin-sitagliptin (Janumet)<br>02333864, 02333872, 02416786,<br>02416794, 02416808              |
| Dipeptidyl peptidase-4 (DPP-4) inhibitors | Alogliptin (Nesina)<br>02417189, 02417197, 02417200                                                 |
|                                           | Alogliptin-metformin (Kazano)<br>02417219, 02417227, 02417235                                       |
|                                           | Alogliptin-pioglitazone (Oseni)                                                                     |

|  |                                                                       |
|--|-----------------------------------------------------------------------|
|  | 02419300, 02419319, 02419327,<br>02419335, 02419343, 02419351         |
|  | Linagliptin (Tradjenta)<br>02370921                                   |
|  | Linagliptin-empagliflozin (Glyxambi)<br>02459752, 02459760            |
|  | Linagliptin-metformin (Jentadueto)<br>02403250, 02403269, 02403277    |
|  | Saxagliptin (Onglyza)<br>02333554, 02375842                           |
|  | Sexagliptin (Apo-Sexagliptin)<br>02507471, 02507498,                  |
|  | Sexagliptin (Sandoz-Sexagliptin)<br>02468603, 02468611                |
|  | Saxagliptin-metformin (Kombiglyze XR)<br>02389169, 02389177, 02389185 |
|  | Sitagliptin (Januvia)<br>02303922, 02388839, 02388847                 |

|                                                                     |                                                                                                                                                                                            |
|---------------------------------------------------------------------|--------------------------------------------------------------------------------------------------------------------------------------------------------------------------------------------|
|                                                                     | <p>Sitagliptin-metformin (Janumet and Janumet XR)</p> <p>02333856, 02333864, 02333872, 02416786, 02416794, 02416808</p>                                                                    |
| Glucagon-like peptide-1 receptor agonists (GLP-1 receptor agonists) | <p>Dulaglutide (Trulicity)</p> <p>02448572, 02448580, 02448599, 02448602, 02530163, 02530171</p>                                                                                           |
|                                                                     | <p>Exenatide (Byetta)</p> <p>02361809, 02361817</p>                                                                                                                                        |
|                                                                     | <p>Exenatide extended release (Bydureon)</p> <p>02448610, 02483203</p>                                                                                                                     |
|                                                                     | <p>Liraglutide</p> <p>02437899, 02351064, 02474875</p>                                                                                                                                     |
|                                                                     | <p>Semaglutide</p> <p>02471469, 02471477, , 02523930, 02497581, 02497603, 02497611, 02522551, 02522578, 02522586, 02522594, 02522608, 02528509, 02528517, 02528525, 02528533, 02528541</p> |
| GLP-1 insulin combinations                                          | <p>(Xultophy, Soliqua)</p> <p>02474875, 02478293</p>                                                                                                                                       |
| Meglitinides                                                        | <p>Nateglinide (Starlix)</p>                                                                                                                                                               |

|                                                |                                                                                                                                                                                                                  |
|------------------------------------------------|------------------------------------------------------------------------------------------------------------------------------------------------------------------------------------------------------------------|
|                                                | 02245439, 02245440, 02245438                                                                                                                                                                                     |
|                                                | Repaglinide<br>02239926, 02239925, 02239924,<br>02355663, 02355671, 02355698,<br>02424258, 02424266, 02424274,<br>02321475, 02321483, 02321491,<br>02354926, 02354934, 02354942,<br>02357453, 02357461, 02357488 |
| Alpha-glucosidase inhibitor                    | Acarbose<br>02493780, 02493799, 02190885,<br>02190893, 02494078, 02494086                                                                                                                                        |
| Sodium-glucose transporter (SGLT) 2 inhibitors | Dapagliflozin (Farxiga)<br>02435462, 02435470                                                                                                                                                                    |
|                                                | Dapagliflozin-metformin (Xigduo XR)<br>02449935, 02449943                                                                                                                                                        |
|                                                | Canagliflozin (Invokana)<br>02425483, 02425491                                                                                                                                                                   |
|                                                | Canagliflozin-metformin (Invokamet)<br>02455404, 02455412, 02455420,<br>02455439, 02455447, 02455455,<br>02477394, 02477408, 02477416, 02477424                                                                  |
|                                                | Empagliflozin (Jardiance)                                                                                                                                                                                        |

|               |                                                                                                                                                                                                                                                                                                                              |
|---------------|------------------------------------------------------------------------------------------------------------------------------------------------------------------------------------------------------------------------------------------------------------------------------------------------------------------------------|
|               | 02443937, 02443945                                                                                                                                                                                                                                                                                                           |
|               | Empagliflozin-linagliptin (Glyxambi)<br>02459752, 02459760                                                                                                                                                                                                                                                                   |
|               | Empagliflozin-metformin (Synjardy)<br>02456575, 02456583, 02456591,<br>02456605, 02456613, 02456621                                                                                                                                                                                                                          |
|               | Ertugliflozin (Steglatro) empagliflozin-<br>metformin (Synjardy)<br>02456575, 02456583, 02456591                                                                                                                                                                                                                             |
| Sulfonylureas | Glimepiride<br>02245272, 02245273, 02245274,<br>02269589, 02269597, 02269619                                                                                                                                                                                                                                                 |
|               | Glimepiride-rosiglitazone (Avandaryl)<br>02258781, 02258803, 02258811                                                                                                                                                                                                                                                        |
|               | Gliclazide<br>02483300, 02483319, 02245247,<br>02297795, 02407124, 02363518,<br>00765996, 02242987, 02356422,<br>02248210, 02287072, 02155850,<br>02248453, 02429764, 02429772,<br>02423286, 02423294, 02229519,<br>02438658, 02449765, 02336316,<br>02294400, 02254719, 02461323,<br>02461331, 02439328, 02463571, 02238103 |



|                    |                                                                                                                                                                                                                                                                         |
|--------------------|-------------------------------------------------------------------------------------------------------------------------------------------------------------------------------------------------------------------------------------------------------------------------|
|                    | <p>Glyburide</p> <p>01913654, 01913662, 02234514,<br/>00720941, 01959352 02350459, 02350467,<br/>02485664, 02236734, 01913670, 01913689<br/>02224550, 02224569, 00012599,<br/>00454753, 01987836, 01987534</p>                                                          |
|                    | <p>Chlorpropamide</p> <p>00399302, 00312711, 00024708, 00024716</p>                                                                                                                                                                                                     |
|                    | <p>Tolbutamide</p> <p>00013889, 00021849, 00012602,<br/>00012610, 00312762, 00156663, 00431168</p>                                                                                                                                                                      |
| Thiazolidinediones | <p>Rosiglitazone</p> <p>02403366, 02403374, 02403382,<br/>02241112, 02241113, 02241114</p>                                                                                                                                                                              |
|                    | <p>Rosiglitazone-glimepiride (Avandaryl)</p> <p>02258781, 02258803, 02258811</p>                                                                                                                                                                                        |
|                    | <p>Pioglitazone</p> <p>02339587, 02339595, 02391600 ,<br/>02302861, 02302888, 02302896 ,<br/>02374587, 02374595, 02302942,<br/>02302950 , 02302977, 02365529,<br/>02365537, 02397307, 02326477,<br/>02326485, 02326493, 02303124,<br/>02303132, 02303140, 02389290,</p> |

|  |                                                                                                      |
|--|------------------------------------------------------------------------------------------------------|
|  | 02389304, 02389312, 02242572,<br>02242573, 02242574                                                  |
|  | Pioglitazone-alogliptin (Oseni)<br><br>02419300, 02419319, 02419327,<br>02419335, 02419343, 02419351 |
